# Supplementary figures and images for: Additive Behavioral Improvement after Combined Cell Therapy and Rehabilitation Despite Long-Term Microglia Presence in Stroke Rats
Source: MDPI journal article supplement (doi:10.3390/ijms22041512), 2021-02-03

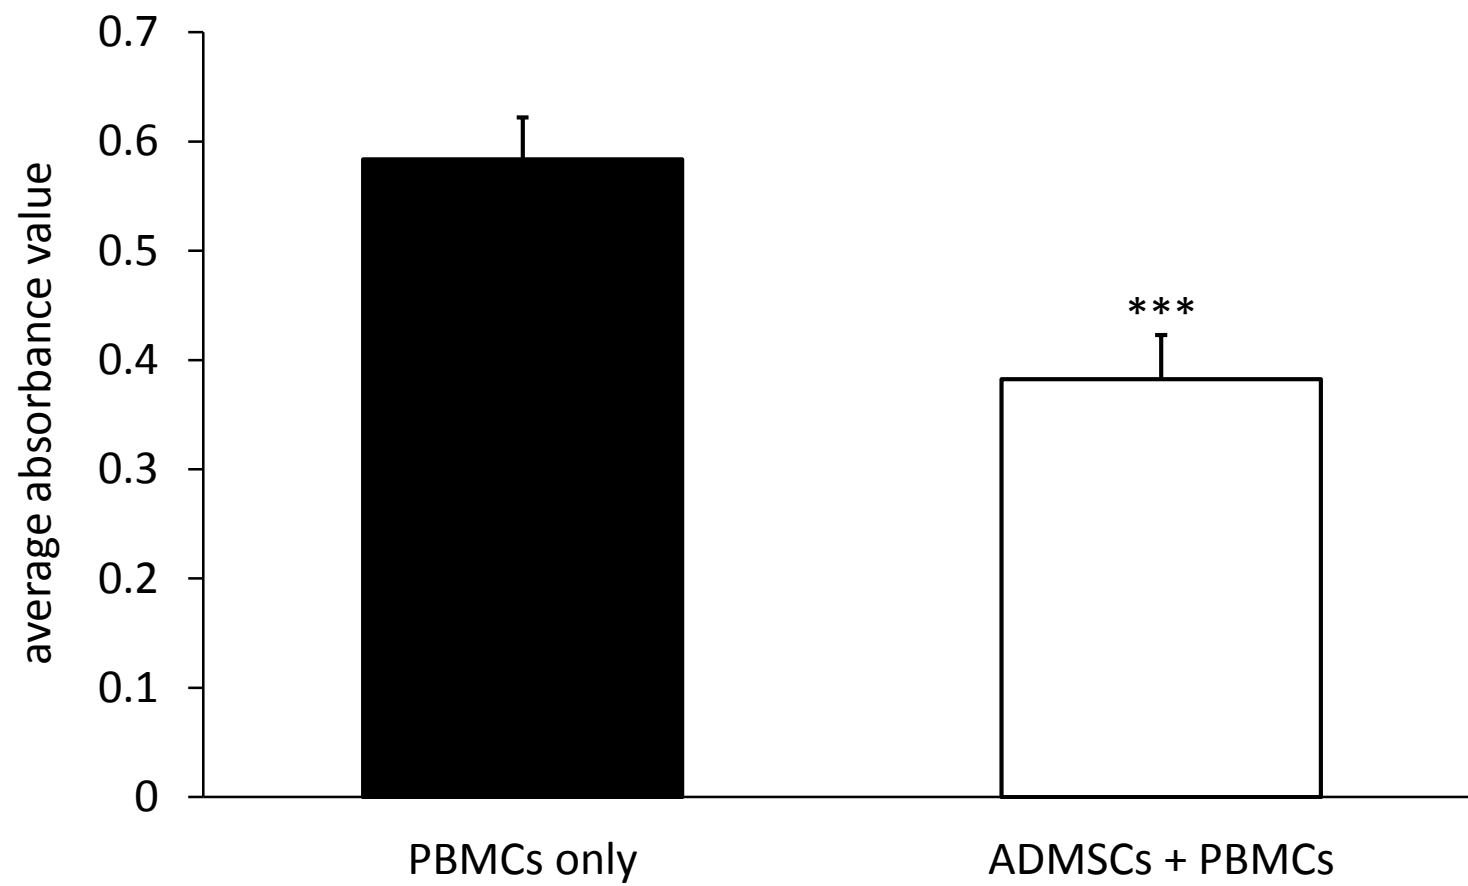

Supplement: s1 [file s1]

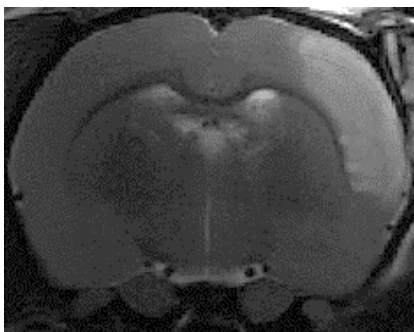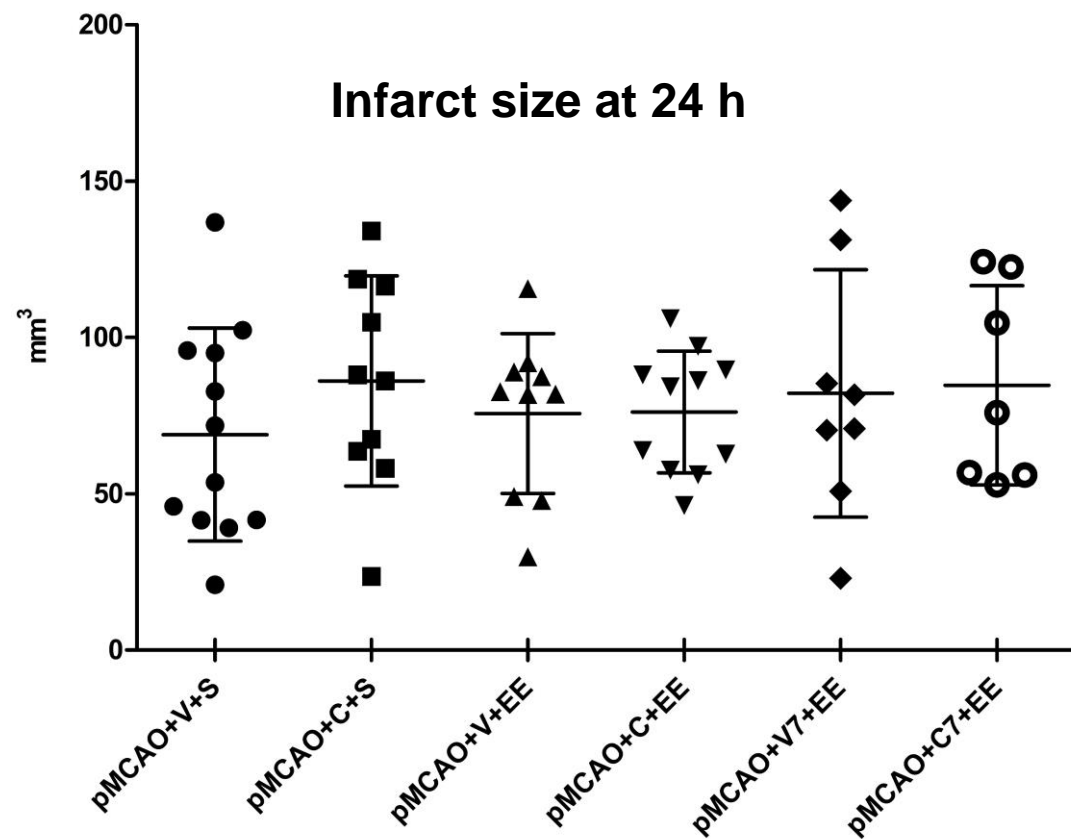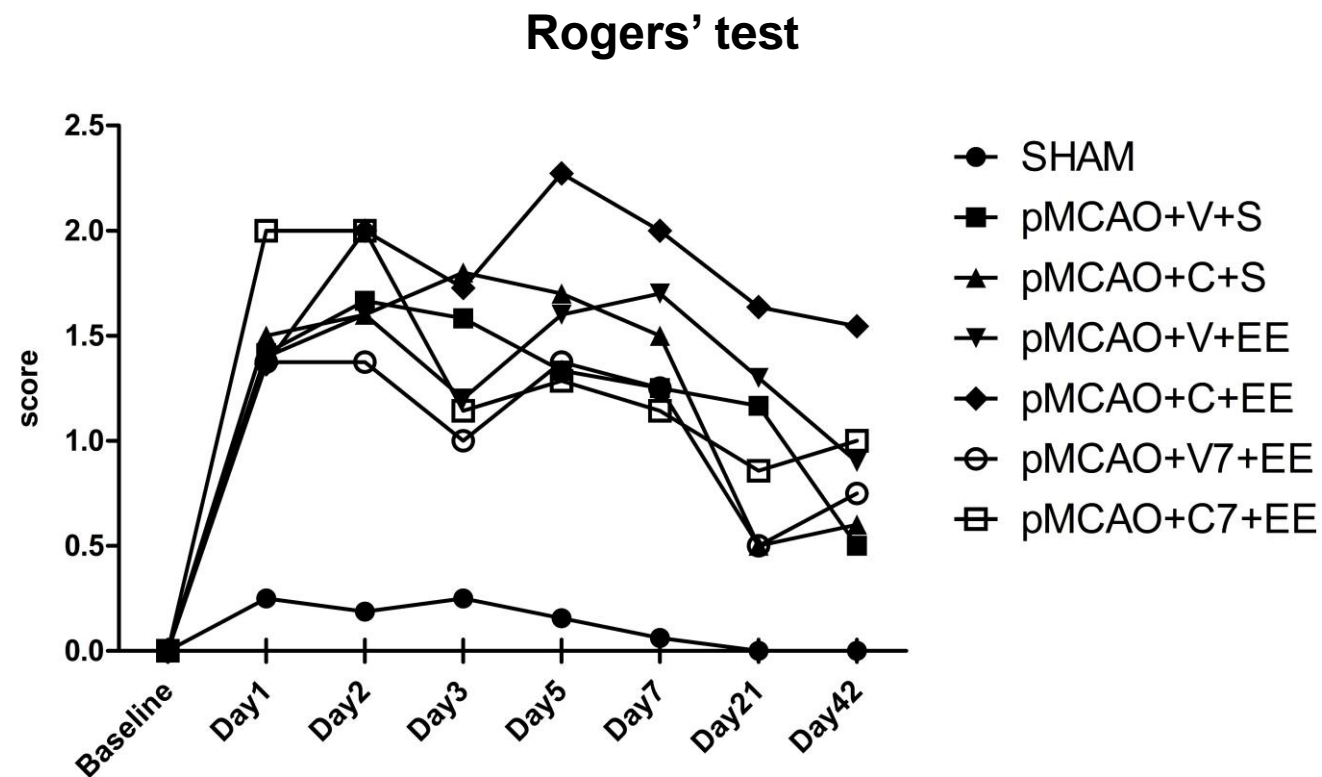

Supplement: s1 [file s1]
